# Supplementary material for: Genetic Heterogeneity of Induced Pluripotent Stem Cells: Results from 24 Clones Derived from a Single C57BL/6 Mouse
Source: PLoS One. 2015 Mar 23;10(3):e0120585. doi: 10.1371/journal.pone.0120585 (PMC4370741; doi:10.1371/journal.pone.0120585)
Supplement: S4 Table — (XLSX) [file pone.0120585.s004.xlsx]

## Sheet: Sheet1
Clone	chromosome_name	start	stop	reference	variant	type	gene_name	transcript_name	transcript_species	transcript_source	transcript_version	strand	transcript_status	trv_type	c_position	amino_acid_change	ucsc_cons	domain	all_domains	deletion_substructures	transcript_error	default_gene_name	gene_name_source	ensembl_gene_id	Normal_ref_count	Normal_var_count	Normal_VAF	total reads normal	Tumor_ref_count	Tumor_var_count	Tumor_VAF	total reads tumor
Ax2-27	6	113680883	113680883	T	A	SNP	Sec13	NM_024206.4	mouse	genbank	58_37k	-1	provisional	missense	c.469	p.S157C	0	HMMSmart_WD40,superfamily_WD40_like,HMMPfam_WD40	HMMSmart_WD40,superfamily_WD40_like,PatternScan_WD_REPEATS_1,HMMPfam_WD40	0	no_errors	Unknown	Unknown	Unknown	604	1	0.17	605	316	271	46.09	587
Ax2-34	11	82817349	82817349	C	T	SNP	Slfn8	NM_181545.4	mouse	genbank	58_37k	-1	validated	missense	c.1965	p.M655I	0	superfamily_SSF52540	HMMPfam_AAA_4,superfamily_SSF52540	0	no_errors	Unknown	Unknown	Unknown	563	1	0.18	564	275	272	49.73	547
Ax2-39	8	98289021	98289021	A	C	SNP	Cnot1	ENSMUST00000098473	mouse	ensembl	58_37k	-1	known	silent	c.1074	p.T358	0	NULL	HMMPfam_Not1,PatternScan_LECTIN_LEGUME_BETA	0	no_errors	Unknown	Unknown	Unknown	568	1	0.18	569	258	267	50.76	525
Ax2-24	9	19143248	19143248	C	A	SNP	Olfr845	NM_207145.2	mouse	genbank	58_37k	1	validated	missense	c.343	p.L115I	0	HMMPfam_7tm_1,PatternScan_G_PROTEIN_RECEP_F1_1,superfamily_SSF81321	HMMPfam_7tm_1,PatternScan_G_PROTEIN_RECEP_F1_1,superfamily_SSF81321	0	no_errors	Unknown	Unknown	Unknown	534	1	0.19	535	162	174	51.79	336
Ax2-16	15	10908392	10908392	T	C	SNP	C1qtnf3	NM_030888.3	mouse	genbank	58_37k	1	provisional	missense	c.703	p.S235P	0	HMMPfam_C1q,HMMSmart_SM00110,superfamily_TNF-like	HMMPfam_C1q,HMMSmart_SM00110,HMMPfam_Collagen,superfamily_TNF-like	0	no_errors	Unknown	Unknown	Unknown	506	1	0.2	507	232	154	39.9	386
Ax2-34	5	14680949	14680949	T	G	SNP	Pclo	NM_011995.4	mouse	genbank	58_37k	1	validated	missense	c.9374	p.I3125S	0	NULL	HMMPfam_C2,HMMSmart_SM00239,HMMPfam_PDZ,HMMSmart_SM00228,superfamily_PDZ domain-like,HMMPfam_zf-piccolo,superfamily_C2 domain (Calcium/lipid-binding domain CaLB),superfamily_FYVE/PHD zinc finger	0	no_errors	Unknown	Unknown	Unknown	509	1	0.2	510	200	201	50.12	401
Ax2-34	18	57424100	57424100	C	T	SNP	Megf10	NM_001001979.	mouse	genbank	58_37k	1	validated	silent	c.1596	p.G532	0	NULL	HMMPfam_Laminin_EGF,HMMSmart_EGF_Lam,HMMSmart_EGF,HMMPfam_EMI,PatternScan_EGF_1,PatternScan_EGF_2,HMMPfam_EGF_2,superfamily_SSF57196	0	no_errors	Unknown	Unknown	Unknown	477	1	0.21	478	185	204	52.04	389
Ax2-34	16	20211717	20211717	A	G	SNP	Yeats2	NM_001033237.2	mouse	genbank	58_37k	1	validated	missense	c.2785	p.S929G	0	NULL	HMMPfam_YEATS	0	no_errors	Unknown	Unknown	Unknown	406	1	0.25	407	191	196	50.65	387
Ax2-20	7	104420355	104420355	T	A	SNP	Gab2	NM_010248.2	mouse	genbank	58_37k	1	validated	silent	c.426	p.S142	0	NULL	HMMPfam_PH,HMMSmart_PH,superfamily_SSF50729	0	no_errors	Unknown	Unknown	Unknown	388	1	0.26	389	231	252	52.17	483
Ax2-26	2	30888565	30888565	C	T	SNP	Fnbp1	NM_001038700.2	mouse	genbank	58_37k	-1	validated	missense	c.1630	p.D544N	0	NULL	HMMPfam_FCH,HMMSmart_FCH,HMMPfam_SH3_1,HMMSmart_SH3,superfamily_SH3	0	no_errors	Unknown	Unknown	Unknown	378	1	0.26	379	231	210	47.62	441
Ax1-11	10	126535960	126535960	T	G	SNP	Os9	NM_177614.3	mouse	genbank	58_37k	-1	validated	missense	c.1055	p.N352T	0	NULL	superfamily_Mannose 6-phosphate receptor domain,HMMPfam_PRKCSH	0	no_errors	Unknown	Unknown	Unknown	366	1	0.27	367	477	484	50.31	961
Ax1-18	12	116404150	116404150	G	T	SNP	ENSMUSG00000076715	ENSMUST00000103524	mouse	ensembl	58_37k	-1	known	missense	c.139	p.L47M	0	HMMSmart_SM00406,HMMPfam_V-set,superfamily_Immunoglobulin	HMMSmart_SM00406,HMMPfam_V-set,superfamily_Immunoglobulin	0	no_stop_codon:bad_bp_length_for_coding_region	Unknown	Unknown	Unknown	368	1	0.27	369	132	132	50	264
Ax1-16	2	111026889	111026889	A	C	SNP	LOC623301	XR_034254.1	mouse	genbank	58_37k	1	model	rna	NULL	NULL	0	0	0	0	pseudogene	Unknown	Unknown	Unknown	359	1	0.28	360	244	231	48.63	475
Ax1-35	12	110956969	110956969	A	C	SNP	ENSMUSG00000070105	ENSMUST00000093597	mouse	ensembl	58_37k	1	known	rna	NULL	NULL	0	0	0	0	no_errors	Unknown	Unknown	Unknown	353	1	0.28	354	145	136	48.4	281
Ax1-8	1	24037271	24037271	A	G	SNP	Fam135a	NM_026604.4	mouse	genbank	58_37k	-1	validated	missense	c.1355	p.L452P	0	NULL	HMMPfam_DUF676,superfamily_alpha/beta-Hydrolases	0	no_errors	Unknown	Unknown	Unknown	353	1	0.28	354	200	206	50.74	406
Ax2-48	17	16806615	16806615	C	T	SNP	LOC100041407	XM_001476338.1	mouse	genbank	58_37k	-1	model	silent	c.618	p.P206	0	HMMPfam_Cmyb_C	HMMPfam_Cmyb_C	0	pseudogene	Unknown	Unknown	Unknown	340	1	0.29	341	163	152	48.25	315
Ax1-8	1	53700343	53700343	A	C	SNP	Dnahc7	XM_001477662.1	mouse	genbank	58_37k	-1	model	missense	c.697	p.L233V	0	NULL	PatternScan_ADH_SHORT,HMMSmart_SM00382,HMMPfam_Dynein_heavy,HMMPfam_AAA_5,HMMPfam_DHC_N2,PatternScan_EF_HAND_1,superfamily_P-loop containing nucleoside triphosphate hydrolases	0	no_errors	Unknown	Unknown	Unknown	335	1	0.3	336	199	207	50.99	406
Ax1-18	9	107454037	107454037	G	A	SNP	Rassf1	ENSMUST00000122225	mouse	ensembl	58_37k	1	known	missense	c.110	p.G37D	0	superfamily_SSF57889	HMMPfam_RA,HMMSmart_RA,HMMPfam_C1_1,HMMSmart_C1,superfamily_SSF57889	0	no_errors	Unknown	Unknown	Unknown	321	1	0.31	322	137	141	50.54	278
Ax1-18	13	100991748	100991748	T	G	SNP	Naip5	NM_010870.2	mouse	genbank	58_37k	-1	validated	silent	c.2934	p.R978	0	NULL	HMMPfam_BIR,HMMSmart_BIR,PatternScan_BIR_REPEAT_1,HMMPfam_NACHT,superfamily_SSF52047,superfamily_SSF57924	0	no_errors	Unknown	Unknown	Unknown	318	1	0.31	319	152	148	49.33	300
Ax1-2	2	20583621	20583621	A	G	SNP	Etl4	NM_001081006.1	mouse	genbank	58_37k	1	validated	missense	c.604	p.M202V	0	NULL	NULL	0	no_errors	Unknown	Unknown	Unknown	317	1	0.31	318	259	226	46.6	485
Ax1-8	5	88922200	88922200	A	T	SNP	Enam	NM_017468.3	mouse	genbank	58_37k	1	validated	missense	c.470	p.D157V	0	NULL	NULL	0	no_errors	Unknown	Unknown	Unknown	325	1	0.31	326	246	235	48.76	481
Ax1-16	8	122157205	122157205	A	G	SNP	Kcng4	NM_025734.2	mouse	genbank	58_37k	-1	provisional	missense	c.331	p.F111L	0	HMMSmart_BTB,HMMPfam_K_tetra,superfamily_BTB/POZ_fold	HMMSmart_BTB,HMMPfam_K_tetra,HMMPfam_Ion_trans,superfamily_BTB/POZ_fold,superfamily_SSF81324	0	no_errors	Unknown	Unknown	Unknown	291	1	0.34	292	228	249	52.2	477
Ax1-14	4	141188401	141188401	T	G	SNP	Plekhm2	ENSMUST00000084203	mouse	ensembl	58_37k	-1	known	missense	c.1029	p.K343N	0	NULL	HMMPfam_PH,HMMSmart_SM00233,HMMPfam_RUN,HMMSmart_SM00593,PatternScan_ALDEHYDE_DEHYDR_CYS,superfamily_PH domain-like	0	no_errors	Unknown	Unknown	Unknown	275	1	0.36	276	406	371	47.75	777
Ax1-23	14	20964303	20964303	A	G	SNP	Kcnk5	NM_021542.4	mouse	genbank	58_37k	-1	provisional	missense	c.340	p.F114L	0	HMMPfam_Ion_trans_2,superfamily_SSF81324	HMMPfam_Ion_trans_2,superfamily_SSF81324	0	no_errors	Unknown	Unknown	Unknown	267	1	0.37	268	181	193	51.6	374
Ax1-8	11	20140320	20140320	A	G	SNP	Cep68	NM_172260.3	mouse	genbank	58_37k	-1	provisional	missense	c.694	p.S232P	0	NULL	superfamily_Spectrin repeat	0	no_errors	Unknown	Unknown	Unknown	260	1	0.38	261	168	186	52.54	354
Ax1-8	10	80252098	80252098	T	C	SNP	Dot1l	NM_199322.1	mouse	genbank	58_37k	1	provisional	missense	c.3433	p.S1145P	0	NULL	HMMPfam_DOT1,HMMPfam_AT_hook,HMMSmart_AT_hook,superfamily_SSF53335	0	no_errors	Unknown	Unknown	Unknown	254	1	0.39	255	205	195	48.63	400
Ax1-8	11	68921969	68921969	T	C	SNP	Per1	NM_011065.4	mouse	genbank	58_37k	1	validated	missense	c.3553	p.S1185P	0	NULL	HMMSmart_PAS,HMMSmart_PAC,HMMPfam_PAS_3,superfamily_SSF55785	0	no_errors	Unknown	Unknown	Unknown	257	1	0.39	258	187	187	50	374
Ax2-30	7	25300372	25300372	T	C	SNP	Zfp428	NM_146183.2	mouse	genbank	58_37k	1	validated	silent	c.354	p.A118	0	NULL	PatternScan_ZINC_FINGER_C2H2_1,HMMSmart_ZnF_C2H2	0	no_errors	Unknown	Unknown	Unknown	475	2	0.42	477	424	448	51.38	872
Ax1-16	5	88757576	88757576	T	C	SNP	Prol1	NM_008644.2	mouse	genbank	58_37k	1	validated	missense	c.682	p.S228P	0	NULL	NULL	0	no_errors	Unknown	Unknown	Unknown	433	2	0.46	435	273	244	47.2	517
Ax1-7	12	102173940	102173940	C	A	SNP	Ccdc88c	NM_026681.4	mouse	genbank	58_37k	-1	provisional	missense	c.3648	p.E1216D	0	NULL	superfamily_Prefoldin,superfamily_tRNA-binding arm	0	no_errors	Unknown	Unknown	Unknown	197	1	0.51	198	271	316	53.83	587
Ax2-4	15	100349028	100349028	A	C	SNP	Tcfcp2	NM_033476.2	mouse	genbank	58_37k	-1	provisional	silent	c.801	p.P267	0	NULL	HMMPfam_CP2,superfamily_SAM/Pointed domain	0	no_errors	Unknown	Unknown	Unknown	552	3	0.54	555	360	275	43.31	635
Ax2-39	11	9299450	9299450	G	A	SNP	Abca13	NM_178259.3	mouse	genbank	58_37k	1	validated	missense	c.11020	p.A3674T	0	NULL	HMMPfam_ABC_tran,HMMSmart_SM00382,PatternScan_ABC_TRANSPORTER_1,superfamily_P-loop containing nucleoside triphosphate hydrolases	0	no_errors	Unknown	Unknown	Unknown	532	3	0.56	535	199	209	51.23	408
Ax1-16	X	143825460	143825460	A	G	SNP	Il13ra2	NM_008356.3	mouse	genbank	58_37k	-1	provisional	missense	c.610	p.F204L	0	superfamily_Fibronectin type III	HMMPfam_Haemat_rec_S_F2,PatternScan_HEMATOPO_REC_S_F2,superfamily_Fibronectin type III	0	no_errors	Unknown	Unknown	Unknown	160	1	0.62	161	2	192	98.97	194
Ax1-16	4	143556040	143556040	T	C	SNP	ENSMUSG00000078510	ENSMUST00000105764	mouse	ensembl	58_37k	-1	known	missense	c.332	p.Q111R	0	superfamily_RNI-like	superfamily_RNI-like	0	no_errors	Unknown	Unknown	Unknown	315	2	0.63	317	185	196	51.44	381
Ax1-7	13	34980005	34980005	A	G	SNP	Prpf4b	NM_013830.2	mouse	genbank	58_37k	1	validated	silent	c.1425	p.R475	0	NULL	HMMSmart_S_TKc,PatternScan_PROTEIN_KINASE_ST,superfamily_Kinase_like,HMMPfam_Pkinase	0	no_errors	Unknown	Unknown	Unknown	427	9	2.06	436	395	372	48.5	767
Ax1-7	5	116120300	116120300	G	A	SNP	Ccdc64	NM_001080808.1	mouse	genbank	58_37k	-1	provisional	silent	c.781	p.L261	0	NULL	NULL	0	no_errors	Unknown	Unknown	Unknown	328	10	2.96	338	377	398	51.35	775
Ax2-24	10	52024482	52024482	A	G	SNP	Dcbld1	NM_025705.3	mouse	genbank	58_37k	1	validated	missense	c.648	p.I216M	0	HMMPfam_LCCL,HMMSmart_SM00603,superfamily_LCCL domain	HMMPfam_CUB,HMMSmart_SM00042,superfamily_Spermadhesin CUB domain,HMMPfam_LCCL,HMMSmart_SM00603,superfamily_LCCL domain	0	no_errors	Unknown	Unknown	Unknown	498	16	3.11	514	223	206	48.02	429
Ax2-34	10	52024482	52024482	A	G	SNP	Dcbld1	NM_025705.3	mouse	genbank	58_37k	1	validated	missense	c.648	p.I216M	0	HMMPfam_LCCL,HMMSmart_SM00603,superfamily_LCCL domain	HMMPfam_CUB,HMMSmart_SM00042,superfamily_Spermadhesin CUB domain,HMMPfam_LCCL,HMMSmart_SM00603,superfamily_LCCL domain	0	no_errors	Unknown	Unknown	Unknown	498	16	3.11	514	215	211	49.53	426
Ax1-23	10	52024482	52024482	A	G	SNP	Dcbld1	NM_025705.3	mouse	genbank	58_37k	1	validated	missense	c.648	p.I216M	0	HMMPfam_LCCL,HMMSmart_SM00603,superfamily_LCCL domain	HMMPfam_CUB,HMMSmart_SM00042,superfamily_Spermadhesin CUB domain,HMMPfam_LCCL,HMMSmart_SM00603,superfamily_LCCL domain	0	no_errors	Unknown	Unknown	Unknown	325	16	4.69	341	180	196	52.13	376
Ax1-5	10	52024482	52024482	A	G	SNP	Dcbld1	NM_025705.3	mouse	genbank	58_37k	1	validated	missense	c.648	p.I216M	0	HMMPfam_LCCL,HMMSmart_SM00603,superfamily_LCCL domain	HMMPfam_CUB,HMMSmart_SM00042,superfamily_Spermadhesin CUB domain,HMMPfam_LCCL,HMMSmart_SM00603,superfamily_LCCL domain	0	no_errors	Unknown	Unknown	Unknown	325	16	4.69	341	253	253	50	506
